# Supplementary material for: Enhanced Production of (R)-3-Hydroxybutyrate Oligomers by Coexpression of Molecular Chaperones in Recombinant Escherichia coli Harboring a Polyhydroxyalkanoate Synthase Derived from Bacillus cereus YB-4
Source: MDPI journal article supplement (doi:10.3390/microorganisms10020458), 2022-02-16
Supplement: s1 [file s1]

## Supplementary Materials

**Table S1.** Effect of coexpression of chaperones on 3HBO production in recombinant *E. coli* BW2511 $\Delta adhE$  with various ethanol concentrations. *E. coli* BW25113 $\Delta adhE$  harboring pGEM-*phaRC*<sub>YB4AB</sub> or pGEM-*phaRC*<sub>YB4AB</sub>+pG-Tf2 were cultivated in LB medium containing 20 g/L glucose at 30 °C for 48 h with various ethanol concentration.

| Ethanol <sup>a</sup> (g/L) | Plasmid                                     | Dry cell weight (g/L) | Extracellular 3HBO (g/L) | Extracellular 3HB (g/L) | Ethanol at 48 h <sup>b</sup> (g/L) |
|----------------------------|---------------------------------------------|-----------------------|--------------------------|-------------------------|------------------------------------|
| 0                          | pGEM- <i>phaRC</i> <sub>YB4AB</sub>         | 9.65                  | 0.10                     | 0.03                    | Trace                              |
|                            | pGEM- <i>phaRC</i> <sub>YB4AB</sub> +pG-Tf2 | 9.76                  | 0.39                     | 0.03                    | Trace                              |
| 0.5                        | pGEM- <i>phaRC</i> <sub>YB4AB</sub>         | 9.70                  | 0.21                     | 0.03                    | 0.20                               |
|                            | pGEM- <i>phaRC</i> <sub>YB4AB</sub> +pG-Tf2 | 9.21                  | 0.62                     | 0.03                    | 0.30                               |
| 1                          | pGEM- <i>phaRC</i> <sub>YB4AB</sub>         | 9.36                  | 0.20                     | 0.04                    | 0.58                               |
|                            | pGEM- <i>phaRC</i> <sub>YB4AB</sub> +pG-Tf2 | 9.12                  | 0.85                     | 0.04                    | 0.63                               |
| 3                          | pGEM- <i>phaRC</i> <sub>YB4AB</sub>         | 8.92                  | 0.65                     | 0.04                    | 2.23                               |
|                            | pGEM- <i>phaRC</i> <sub>YB4AB</sub> +pG-Tf2 | 8.50                  | 1.35                     | 0.04                    | 2.30                               |
| 5                          | pGEM- <i>phaRC</i> <sub>YB4AB</sub>         | 8.48                  | 1.23                     | 0.03                    | 4.05                               |
|                            | pGEM- <i>phaRC</i> <sub>YB4AB</sub> +pG-Tf2 | 8.22                  | 1.60                     | 0.05                    | 3.82                               |
| 10                         | pGEM- <i>phaRC</i> <sub>YB4AB</sub>         | 7.53                  | 1.90                     | 0.04                    | 8.38                               |
|                            | pGEM- <i>phaRC</i> <sub>YB4AB</sub> +pG-Tf2 | 7.56                  | 2.07                     | 0.07                    | 8.02                               |

<sup>a</sup> Ethanol was added at the beginning of cultivation. <sup>b</sup> Ethanol concentration in the culture supernatant after 48 h of cultivation.

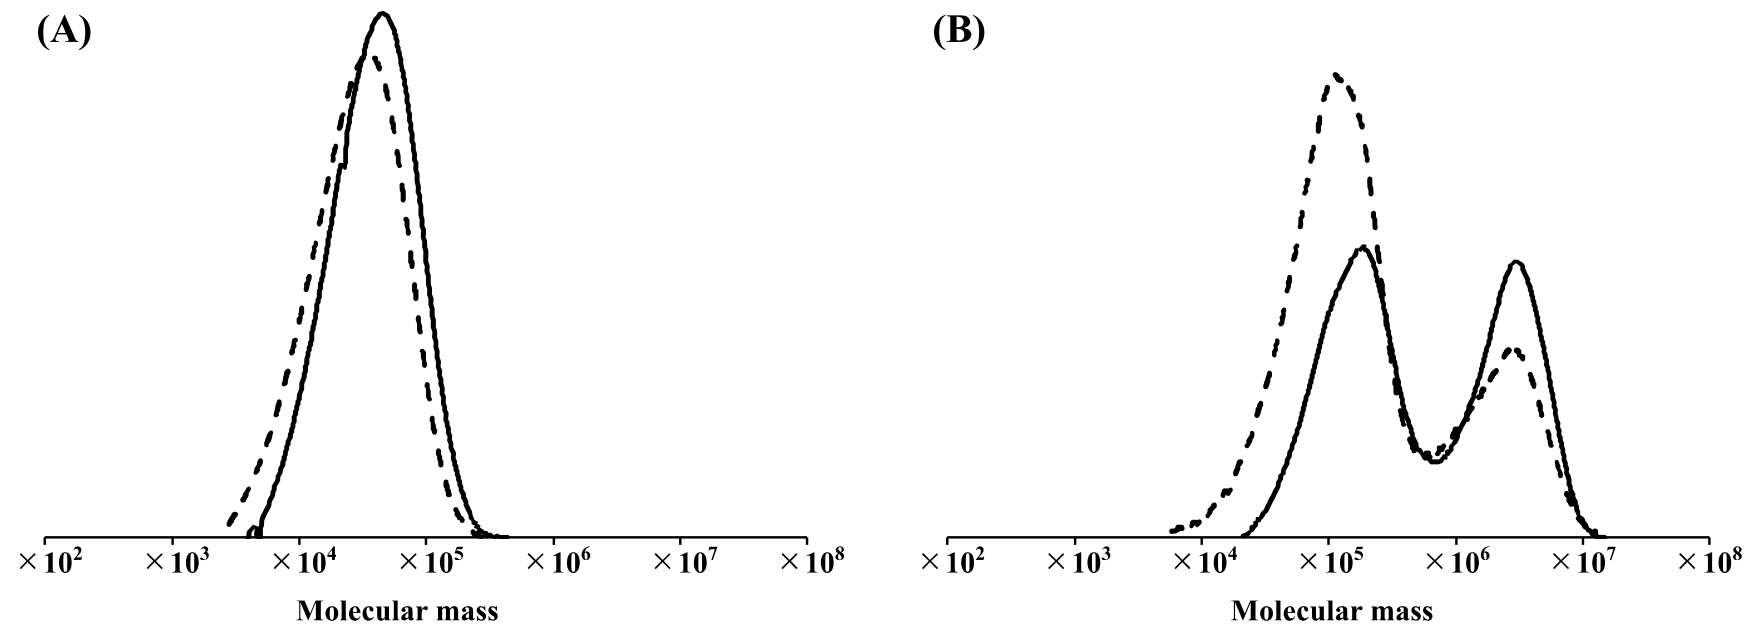

**Figure S1.** Molecular weight distribution of P(3HB) extracted from recombinant *E. coli* BW25113 WT (A) or  $\Delta adhE$  (B) at 48 h of cultivation. Solid line, pGEM-*phaRC*<sub>YB4AB</sub>; broken line, pGEM-*phaRC*<sub>YB4AB</sub>+pG-Tf2.

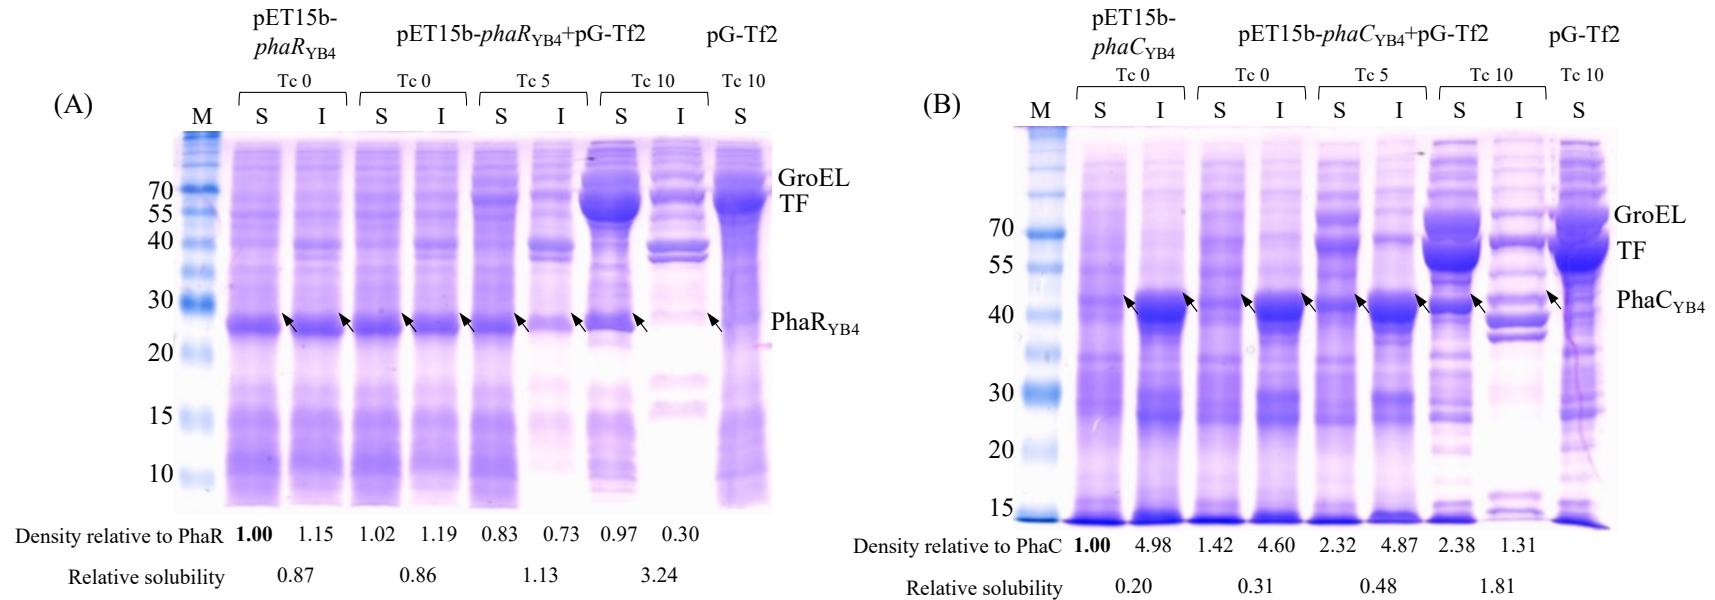

**Figure S2.** Effect of the chaperone plasmid pG-Tf2 on the solubilization of PhaR<sub>YB4</sub> and PhaC<sub>YB4</sub>. The levels of solubilized PhaR<sub>YB4</sub> and PhaC<sub>YB4</sub> were evaluated by SDS-PAGE. **(A)** *E. coli* BL21(DE3) harboring pET15b-*phaR<sub>YB4</sub>*, pET15b-*phaR<sub>YB4</sub>*+pG-Tf2 or pG-Tf2 and **(B)** *E. coli* BL21(DE3) harboring pET15b-*phaC<sub>YB4</sub>*, pET15b-*phaC<sub>YB4</sub>*+pG-Tf2 or pG-Tf2 were cultivated with 0-10 µg/L tetracycline (Tc). After sonication of each cell sample, soluble (S) and insoluble (I) fractions were analyzed by SDS-PAGE. The arrows indicate the bands corresponding to PhaR<sub>YB4</sub> and PhaC<sub>YB4</sub>. The relative densities were calculated using ImageJ software. The density relative to the band of PhaR<sub>YB4</sub> or PhaC<sub>YB4</sub> is the ratio of the density of each band to that of the band for the soluble fraction of PhaR<sub>YB4</sub> or PhaC<sub>YB4</sub> alone (bold). The relative solubilities are the ratios of the S to I fractions within each sample.
